# Supplementary material for: Hard Coating Materials Based on Photo-Reactive Silsesquioxane for Flexible Application: Improvement of Flexible and Hardness Properties by High Molecular Weight
Source: MDPI journal article supplement (doi:10.3390/polym13101564), 2021-05-13
Supplement: s1 [file s1]

## Hard Coating Materials based on Photo-Reactive Silsesquioxane for Flexible Application: Improvement of Flexible and Hardness Properties by High Molecular Weight

Jong Tae Leem <sup>1,2</sup>, Woong Cheol Seok <sup>1</sup>, Ji Beom Yoo <sup>2</sup>, Sangkug Lee <sup>1</sup> and Ho Jun Song <sup>1,\*</sup>

<sup>1</sup> Green and Sustainable Materials R&D Department/Research Institute of Clean Manufacturing System, Korea Institute of Industrial Technology, 89 Yangdaegiro-gil, Ipjang-myeon, Seobuk-gu, Cheonan-si, Chungcheongnam-do, 331-822, Republic of Korea

<sup>2</sup> School of Advanced Materials Science and Engineering, Sungkyunkwan University, Suwon 16419, Republic of Korea

Phone : 82-41-589-8467; Fax: 82-41-589-8550; E-mail: [song3026@kitech.re.kr](mailto:song3026@kitech.re.kr)\*

\*Corresponding Author

Ph. D. Ho Jun Song, E-mail : [song3026@kitech.re.kr](mailto:song3026@kitech.re.kr)

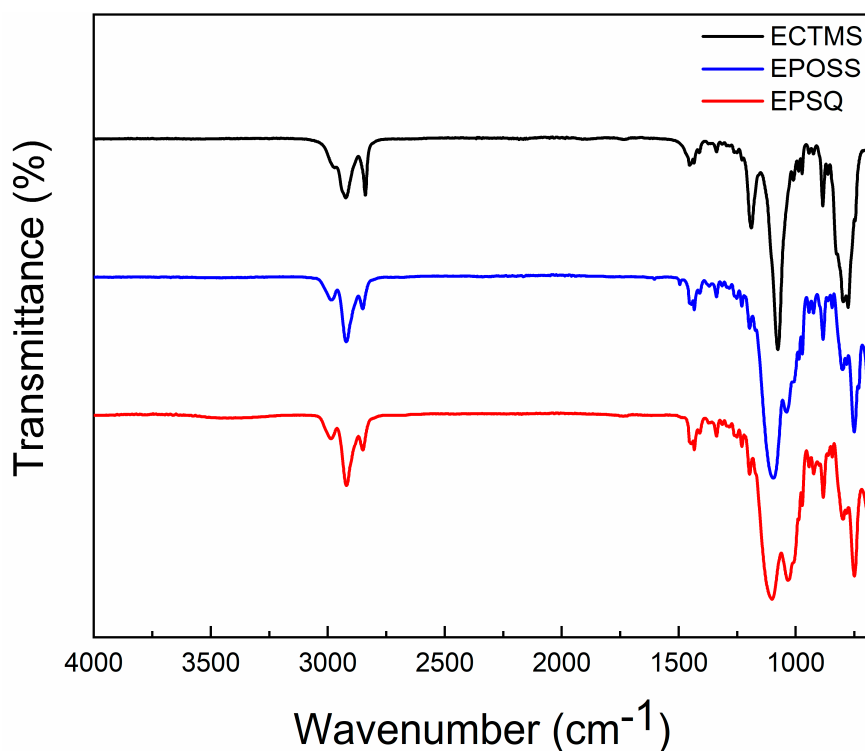

**Figure S1.** FT-IR spectra of ECTMS, EPOSS, and EPSQ.

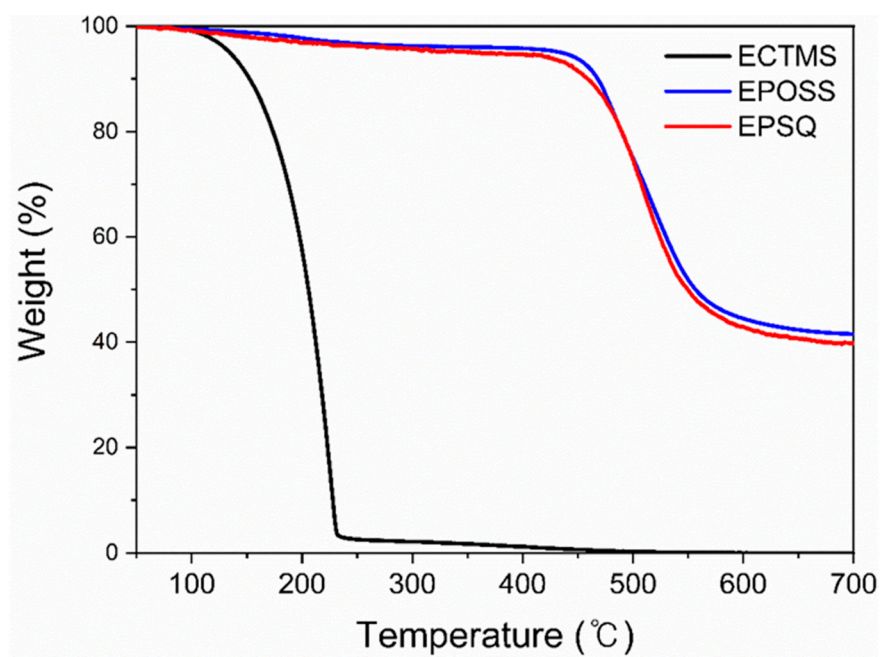

Figure S2. TGA spectra of ECTMS, EPOSS, and EPSQ.

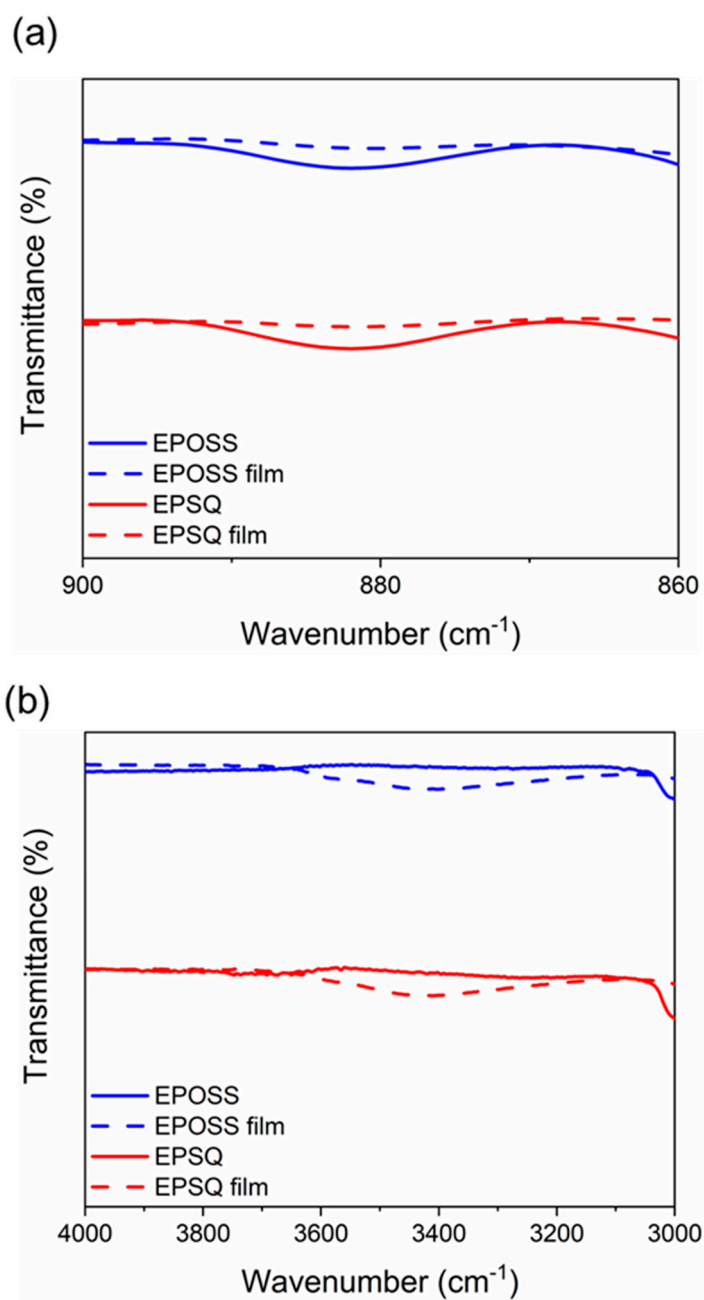

**Figure S3.** FT-IR spectra of UV curing for EPOSS and EPSQ: (a) epoxy group in the range of 860-900 $\text{cm}^{-1}$  and (b) hydroxyl group in the range of 3000-4000  $\text{cm}^{-1}$ .

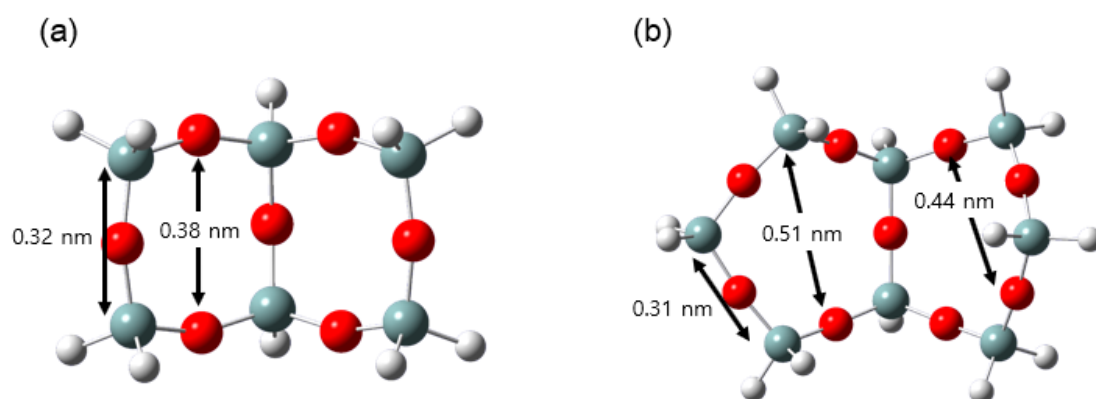

**Figure S4.** Molecular structures of silsesquioxane analyzed by DFT calculation (Gaussian): (a) square shape and (b) pentagon shape.

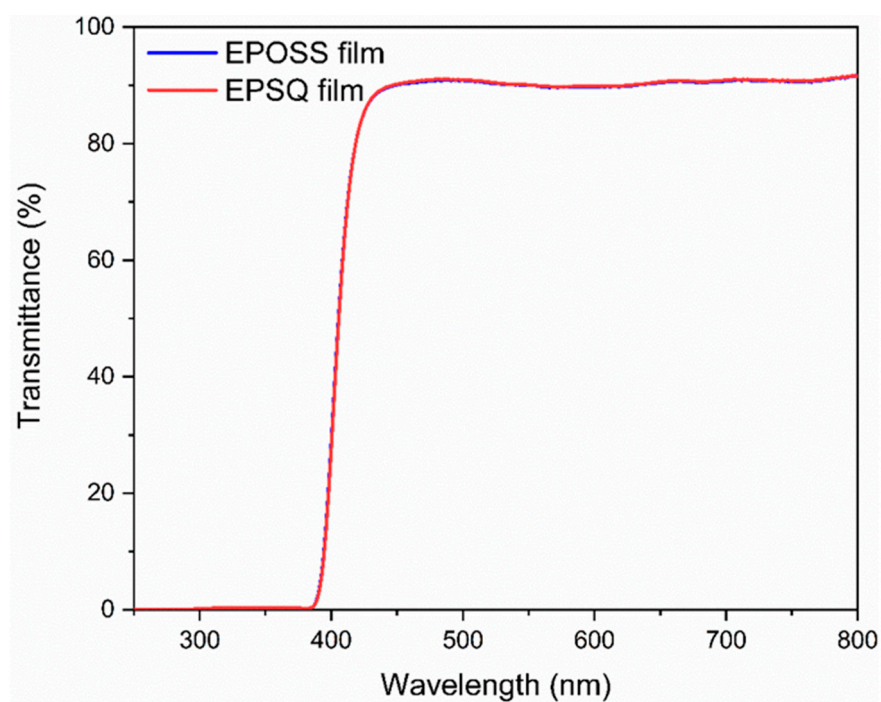

Figure S5. UV-vis spectra of EPOSS and EPSQ films.
